# Supplementary material for: Skeletochronology and Paleohistology of Hyposaurus rogersii (Crocodyliformes, Dyrosauridae) from the Early Paleogene of New Jersey, USA
Source: MDPI journal article supplement (doi:10.3390/ani11113067), 2021-10-27
Supplement: s1 [file s1]

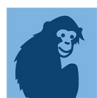

**Supplementary Table S1.** New Jersey State Museum (NJSM) 23368 Medullary Cavity Measurements by Element to the nearest micron. Diameters measured from clearly identifiable bone to clearly identifiable bone across the cavity (obscure areas considered part of cavity), then divided by two to obtain the radii. The left femur has no strut in its medullary cavity, so the area measurements are the same for the relevant columns. Percentages obtained by multiplying the medullary cavity area by 100 and dividing by the area of the entire cross section (area of cortex plus area of cavity, including strut when present). CPL=Circularly Polarized Light.

| Element       | Slide | Scan  | Radius a | Radius b | Circumference | Area without strut ( $\mu\text{m}^2$ ) | Area, including strut ( $\mu\text{m}^2$ ) | Area of cortex ( $\mu\text{m}^2$ ) | Percentage of the element transverse sectional area occupied by medullary cavity |
|---------------|-------|-------|----------|----------|---------------|----------------------------------------|-------------------------------------------|------------------------------------|----------------------------------------------------------------------------------|
| Right Humerus | 1     | 1     | 3199     | 2473     | 17893         | 22455610                               | 26349510                                  | 286538115                          | 8.5                                                                              |
| Left Humerus  | 3     | 3a    | 3174     | 2628     | 18265         | 23319332                               | 28198383                                  | 289665515                          | 9.0                                                                              |
| Right Femur   | 1     | 1 CPL | 3266     | 2473     | 18117         | 18818314                               | 26980140                                  | 390505013                          | 6.5                                                                              |
| Left Femur    | 2     | 2 CPL | 3478     | 2262     | 18234         | 27846676                               | 27846676                                  | 390954452                          | 6.6                                                                              |

**Supplementary Table S2.** Values obtained from NJSM 23368 Right Humerus slide 1 and Alligator MOR OST-1647 Left Humerus (where noted) used in Skeletochronology models (to the nearest micron). MOR OST=Museum of the Rockies, Osteology Collection.

| Description                                                                                                                                                                              | Value |
|------------------------------------------------------------------------------------------------------------------------------------------------------------------------------------------|-------|
| Major Axis (a-) Broadest Band/Interval                                                                                                                                                   | 818   |
| Major Axis (a+) Broadest Band/Interval                                                                                                                                                   | 866   |
| Major Axis (a-) Average Band/Mean interval                                                                                                                                               | 453   |
| Major Axis (a+) Average Band/Mean interval                                                                                                                                               | 566   |
| Major Axis (a-) Penultimate interval                                                                                                                                                     | 388   |
| Major Axis (a+) Penultimate interval                                                                                                                                                     | 368   |
| Major Axis (a-) Mean Percentage Centripetal Increase Factor                                                                                                                              | 20.65 |
| Major Axis (a+) Mean Percentage Centripetal Increase Factor                                                                                                                              | 24.00 |
| Alligator MOR OST-1647 Left Humerus radius a                                                                                                                                             | 708   |
| Alligator MOR OST-1647 Left Humerus radius b                                                                                                                                             | 558   |
| Distance from neonate MOR OST-1647 Left Humerus periosteal surface to 1st CGM in NJSM 23368 Right Humerus along radius a-                                                                | 2539  |
| Distance from neonate MOR OST-1647 Left Humerus periosteal surface to 1st CGM in NJSM 23368 Right Humerus along radius a+                                                                | 3914  |
| Broadest band Retrocalculation of CGMs Lost to Remodeling (Distance from 1st preserved CGM to neonate periosteal surface divided by thickest interval preserved), radius a-              | 3.10  |
| Broadest band Retrocalculation of CGMs Lost to Remodeling (Distance from 1st preserved CGM to neonate periosteal surface divided by thickest interval preserved), radius a+              | 4.52  |
| Penultimate interval Retrocalculation of CGMs Lost to Remodeling (Distance from 1st preserved CGM to neonate periosteal surface divided by thickness of penultimate interval), radius a- | 6.55  |
| Penultimate interval Retrocalculation of CGMs Lost to Remodeling (Distance from 1st preserved CGM to neonate periosteal surface divided by thickness of penultimate interval), radius a+ | 10.62 |
| Mean interval Retrocalculation of CGMs Lost to Remodeling (Distance from 1st preserved CGM to neonate periosteal surface divided by mean interval), radius a-                            | 5.61  |
| Mean interval Retrocalculation of CGMs Lost to Remodeling (Distance from 1st preserved CGM to neonate periosteal surface divided by mean interval), radius a+                            | 6.91  |

**Supplementary Table S3.** Calculation of Mean Percentage Centripetal Increase Factor for the Right Humerus of NJSM 23368, calculated from measurements taken from slide 1 (Table 1).

| Centripetal Percentage Increase             | Radius a- | Radius a+ |
|---------------------------------------------|-----------|-----------|
| 1                                           | 86.96     | 93.24     |
| 2                                           | 1.66      | 44.41     |
| 3                                           | 11.44     | 7.02      |
| 4                                           | 18.77     | 27.60     |
| 5                                           | 10.62     | 19.15     |
| 6                                           | -50.67    | -47.47    |
| 7                                           | 36.20     | 77.62     |
| 8                                           | 20.27     | -39.07    |
| 9                                           | 6.35      | 33.51     |
| 10                                          | 64.94     | N/A       |
| 11                                          | N/A       | N/A       |
| Sum                                         | 206.53    | 216.00    |
| Mean Percentage Centripetal Increase Factor | 20.65     | 24.00     |

**Supplementary Table S4.** Mean Percentage Increase Retrocalculation of CGMs for the right humerus of NJSM 23368, radius a (to the nearest micron). As can be seen by comparing the last row to the three above it, only 2 CGMs are likely to have been lost—but no more than 3—in radius a-, while only 3 to 4 CGMs are likely to have been lost in a+.

| Mean Percentage Increase extrapolation calculation of missing CGMs. | Radius a- | Radius a+ |
|---------------------------------------------------------------------|-----------|-----------|
| Thickness of first missing CGM interval                             | 987       | 815       |
| Thickness of second missing CGM interval                            | 1191      | 1010      |
| Thickness of third missing CGM interval                             | 1436      | 1252      |
| Thickness of fourth missing CGM interval                            | N/A       | 1553      |
| Thickness of fifth missing CGM interval                             | N/A       | 1926      |
| Sum of above thicknesses (Only 2 CGMs Retro Calculated)             | 2177      | 1825      |
| Sum of above thicknesses (3 CGMs Retro Calculated)                  | 3614      | 3077      |
| Sum of above thicknesses (4 CGMs Retro Calculated)                  | N/A       | 4630      |
| Distance from 1st preserved CGM to neonate periosteal surface       | 2539      | 3914      |

**Supplementary Table S5.** Parabolic model retrocalculation of missing CGMs along the main axis of right humerus of NJSM 23368 (to the nearest micron). Only 5 to 6 intervals are likely to be missing on radius a- according to this model, while 6 intervals are likely to be missing in radius a+. RetroCGMs=Retrocalculated Cyclical Growth Marks.

| Missing CGM number                                            | Thickness, radius a- | Thickness, radius a+ |
|---------------------------------------------------------------|----------------------|----------------------|
| 1                                                             | 496                  | 492                  |
| 2                                                             | 466                  | 808                  |
| 3                                                             | 388                  | 455                  |
| 4                                                             | 285                  | 866                  |
| 5                                                             | 577                  | 726                  |
| 6                                                             | 522                  | 569                  |
| Sum of RetroCGMs 1 through 5                                  | 2211                 | 3346                 |
| Sum of RetroCGMs 1 through 6                                  | 2733                 | 3916                 |
| Distance from 1st preserved CGM to neonate periosteal surface | 2539                 | 3914                 |

**Supplementary Table S6.** Values obtained from NJSM 23368 Right Femur slide 1 and Alligator MOR OST-1647 Right Femur (where noted) used in Skeletochronology models (to the nearest micron).

| Description                                                                                                                                                                              | Value |
|------------------------------------------------------------------------------------------------------------------------------------------------------------------------------------------|-------|
| Major Axis (a+) Broadest Band/Interval                                                                                                                                                   | 1252  |
| Major Axis (a+) Average Band/Mean interval                                                                                                                                               | 669   |
| Major Axis (a+) Penultimate interval                                                                                                                                                     | 304   |
| Major Axis (a+) Mean Percentage Centripetal Increase Factor                                                                                                                              | 21.46 |
| Alligator MOR OST-1647 Right Femur radius a                                                                                                                                              | 664   |
| Distance from neonate MOR OST-1647 Right Femur periosteal surface to 1st CGM in NJSM 23368 Right Femur along radius a+                                                                   | 4056  |
| Broadest band Retrocalculation of CGMs Lost to Remodeling (Distance from 1st preserved CGM to neonate periosteal surface divided by thickest interval preserved), radius a+              | 3.24  |
| Penultimate interval Retrocalculation of CGMs Lost to Remodeling (Distance from 1st preserved CGM to neonate periosteal surface divided by thickness of penultimate interval), radius a+ | 13.34 |
| Mean interval Retrocalculation of CGMs Lost to Remodeling (Distance from 1st preserved CGM to neonate periosteal surface divided by mean interval), radius a+                            | 6.06  |

**Supplementary Table S7.** Calculation of Mean Percentage Centripetal Increase Factor for the Right Femur of NJSM 23368, calculated from measurements taken from slide 1 (Table 2).

| Centripetal Percentage Increase             | Radius a+     |
|---------------------------------------------|---------------|
| 1                                           | 9.26          |
| 2                                           | 98.31         |
| 3                                           | -7.69         |
| 4                                           | 49.07         |
| 5                                           | 11.18         |
| 6                                           | -35.75        |
| 7                                           | 109.57        |
| 8                                           | -37.76        |
| 9                                           | 62.00         |
| 10                                          | -79.01        |
| 11                                          | 56.86         |
| 12                                          | Not Preserved |
| Sum                                         | 236.03        |
| Mean Percentage Centripetal Increase Factor | 21.46         |

**Supplementary Table S8.** Mean Percentage Increase Retrocalculation of CGMs for the right femur of NJSM 23368, radius a+ (to the nearest micron). According to this model, only 5 CGMs are likely missing, certainly no more than 6.

| Description                                                   | Value |
|---------------------------------------------------------------|-------|
| Thickness of first missing CGM interval                       | 501   |
| Thickness of second missing CGM interval                      | 608   |
| Thickness of third missing CGM interval                       | 738   |
| Thickness of fourth missing CGM interval                      | 897   |
| Thickness of fifth missing CGM interval                       | 1089  |
| Thickness of sixth missing CGM interval                       | 1323  |
| Sum of above thicknesses (Only 2 CGMs Retro Calculated)       | 1109  |
| Sum of above thicknesses (3 CGMs Retro Calculated)            | 1847  |
| Sum of above thicknesses (4 CGMs Retro Calculated)            | 2744  |
| Sum of above thicknesses (5 CGMs Retro Calculated)            | 3833  |
| Sum of above thicknesses (6 CGMs Retro Calculated)            | 5157  |
| Distance from 1st preserved CGM to neonate periosteal surface | 4056  |

**Supplementary Table S9.** Parabolic model retrocalculation of missing CGMs along the major axis of the right femur of NJSM 23368 (to the nearest micron). Only 5 CGMs are missing according to this model.

| Description                                                   | Value |
|---------------------------------------------------------------|-------|
| 1st missing interval                                          | 263   |
| 2nd missing interval                                          | 1252  |
| 3rd missing interval                                          | 773   |
| 4th missing interval                                          | 1242  |
| 5th missing interval                                          | 592   |
| 6th missing interval                                          | 922   |
| Sum of RetrocCGMs 1 through 4                                 | 3529  |
| Sum of RetrocCGMs 1 through 5                                 | 4122  |
| Sum of RetrocCGMs 1 through 6                                 | 5044  |
| Distance from 1st preserved CGM to neonate periosteal surface | 4056  |
